# Supplementary material for: Assessment of Insect Communities with Metabarcoding
Source: Research Square preprint supplement (doi:10.21203/rs.3.rs-7367951/v1), 2025-09-04
Supplement: Supplementary file 1 [file f5a0a4041d1342324a388944.pdf]

# Supplementary Information

## Assessment of Insect Communities with Metabarcoding

Hendra F. Sihaloho<sup>1,2\*</sup>, Isham Azhar<sup>1,3</sup>, Millawati Gani<sup>4</sup>, Juliana Senawi<sup>3,5,6</sup>, Lim Shu Yong<sup>7</sup>, Qasim Ayub<sup>7</sup>, Rahul De<sup>1</sup>, Tigga Kingston<sup>1,3</sup>, Caleb D. Phillips<sup>1,2\*</sup>

<sup>1</sup>Department of Biological Sciences, Texas Tech University, Lubbock, TX 79409-3131

<sup>2</sup>Natural Science Research Laboratory, Museum, Texas Tech University, Lubbock, TX 79409-3191

<sup>3</sup>Southeast Asian Bat Conservation Research Unit, Lubbock, TX,

<sup>4</sup>National Wildlife Forensic Laboratory, Ex-Situ Conservation Division, Department of Wildlife and National Parks Peninsular Malaysia, Km. 10, Jalan Cheras, 56100, Kuala Lumpur, Malaysia

<sup>5</sup>Department of Biological Sciences and Biotechnology, Faculty of Science and Technology, Universiti Kebangsaan Malaysia, 43600 Bangi, Selangor, Malaysia

<sup>6</sup>Langkawi Research Centre, Tuanku Abdul Halim Mu'adzam Shah Campus, Universiti Kebangsaan Malaysia, Jalan Teluk Yu, Teluk Burau, 07100 Langkawi, Kedah, Malaysia

<sup>7</sup>Monash University Malaysia, Genomics Platform, School of Science, 47500 Bandar Sunway, Selangor Darul Ehsan, Malaysia

\*hendra.sihaloho@ttu.edu; caleb.phillips@ttu.edu

*Table S1. Analysis of Variance to test if the subsample combination affected the diversity recovered (subsample combination at a given subsampling depth was a nested variable within the light trap).*

|                              | Df   | Sum Sq    | Mean Sq  | F value   | Pr(>F) | Signif |
|------------------------------|------|-----------|----------|-----------|--------|--------|
| factor(sam)                  | 5    | 209534481 | 41906896 | 72673.782 | <2e-16 | ***    |
| factor(sam):factor(sam_comb) | 2964 | 1141755   | 385      | 0.668     | 1      |        |
| Residuals                    | 8910 | 5137897   | 577      |           |        |        |

Signif. codes: 0 '\*\*\*' 0.001 '\*\*' 0.01 '\*' 0.05 '.' 0.1 ' ' 1

```
aov(formula = jum ~ factor(sam)/factor(sam_comb), data = jum.all)
```

```
jum = Number of OTUs
```

```
sam = Light trap samples
```

```
sam_comb = Light trap subsample combination (12C4)
```

```
jum.all = an R dataframe object
```

Supplementary re-analysis of Zizka et al. (2022).

Data published by Zizka et al. (2022) was sub-sampled and re-analyzed using the same pipeline described herein. The results were summarized in Figure S1 and Table S3.

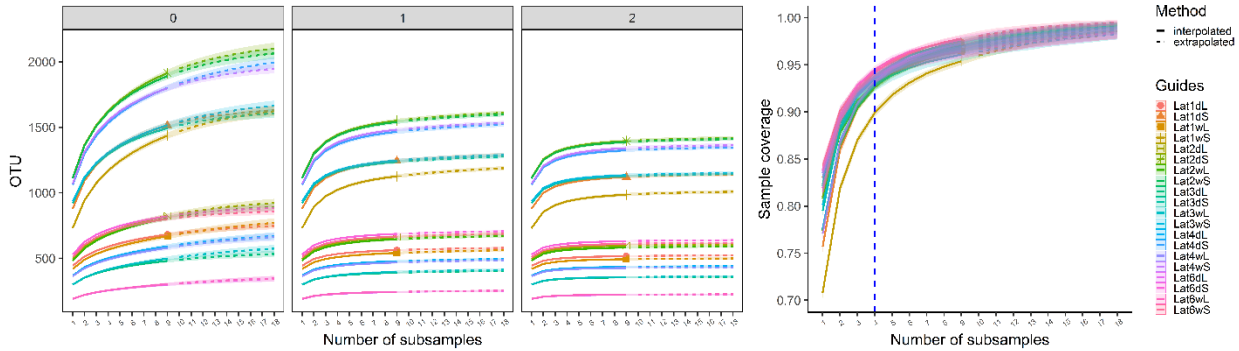

Figure S1. Raw data for insect subsamples from Zizka et al. (2022) was randomly depleted to the average sequencing depth of subsamples of the current study (23,119 read pairs). Rarefaction and extrapolation for different Hill numbers (Hill<sub>0</sub>: richness, Hill<sub>1</sub>: exponential Shannon-Wiener, Hill<sub>2</sub>: Inverse Simpson ) and their sample coverage (most right) is reported. Each sample rarefaction curve was extrapolated to twice of subsample depth and includes 95% confidence interval.

Table S2. Estimated Hill<sub>0</sub> with 4 subsamples resulted in 90.30 - 95.10% sample coverage (93.82 ± 0.99, mean ± standard deviation). Site: sample name, t: number of sub-samples, SC: sample coverage, qD: estimate Hill<sub>0</sub>, qD.LCL: lower confidence limit of Hill<sub>0</sub>, qD.UCL: upper confidence limit of Hill<sub>0</sub>.

| site   | t | method       | SC | qD     | qD.LCL  | qD.UCL  |
|--------|---|--------------|----|--------|---------|---------|
| Lat1dL | 4 | interpolated | 0  | 0.9490 | 555.68  | 547.01  |
| Lat1dS | 4 | interpolated | 0  | 0.9320 | 1248.50 | 1234.88 |
| Lat1wL | 4 | interpolated | 0  | 0.9410 | 539.86  | 529.28  |
| Lat1wS | 4 | interpolated | 0  | 0.9030 | 1118.44 | 1103.09 |
| Lat2dL | 4 | interpolated | 0  | 0.9380 | 638.44  | 628.18  |
| Lat2dS | 4 | interpolated | 0  | 0.9310 | 1557.50 | 1542.04 |
| Lat2wL | 4 | interpolated | 0  | 0.9360 | 629.95  | 619.33  |
| Lat2wS | 4 | interpolated | 0  | 0.9330 | 1550.76 | 1535.63 |
| Lat3dL | 4 | interpolated | 0  | 0.9430 | 379.75  | 372.47  |
| Lat3dS | 4 | interpolated | 0  | 0.9420 | 1246.03 | 1232.55 |
| Lat3wL | 4 | interpolated | 0  | 0.9370 | 385.33  | 375.83  |
| Lat3wS | 4 | interpolated | 0  | 0.9410 | 1255.87 | 1241.43 |
| Lat4dL | 4 | interpolated | 0  | 0.9420 | 464.11  | 454.78  |
| Lat4dS | 4 | interpolated | 0  | 0.9340 | 1475.30 | 1460.19 |
| Lat4wL | 4 | interpolated | 0  | 0.9420 | 456.82  | 447.03  |
| Lat4wS | 4 | interpolated | 0  | 0.9360 | 1491.66 | 1477.43 |
| Lat6dL | 4 | interpolated | 0  | 0.9430 | 226.29  | 219.54  |
| Lat6dS | 4 | interpolated | 0  | 0.9510 | 679.38  | 669.62  |
| Lat6wL | 4 | interpolated | 0  | 0.9430 | 228.05  | 221.47  |
| Lat6wS | 4 | interpolated | 0  | 0.9480 | 667.87  | 658.83  |

37 **References**

38 Zizka VMA, Geiger MF, Hörren T, Kirse A, Noll NW, Schäffler L, Scherges AM, Sorg M (2022) Repeated subsamples  
39 during DNA extraction reveal increased diversity estimates in DNA metabarcoding of malaise traps. Ecol  
40 Evol 12(11):e9502. <https://doi.org/10.1002/ece3.9502>

41
